# Supplementary material for: Harnessing CD3 diversity to optimize CAR T cells
Source: PubMed Central journal article supplement (PMC10681901; doi:10.1038/s41590-023-01658-z), 2023-11-06
Supplement: 41590_2023_1658_MOESM1_ESM.pdf [file 41590_2023_1658_MOESM1_ESM.pdf]

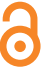

---

# Harnessing CD3 diversity to optimize CAR T cells

---

In the format provided by the authors and unedited

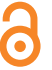

---

# Harnessing CD3 diversity to optimize CAR T cells

---

In the format provided by the authors and unedited

---

**Supplementary Table 1. Antibodies used for mass cytometry (CyTOF)**

| Channel | Antigen                  | Supplier                  | Clone       | Cat#       |
|---------|--------------------------|---------------------------|-------------|------------|
| 89Y     | CD45                     | fluidigm                  | HI30        | 3089003B   |
| 104Pd   | $\beta$ 2m-Barcode       | Biolegend                 | 2M2         | 316302     |
| 105Pd   | $\beta$ 2m-Barcode       | Biolegend                 | 2M2         | 316302     |
| 106Cd   | $\beta$ 2m-Barcode       | Biolegend                 | 2M2         | 316302     |
| 108Pd   | $\beta$ 2m-Barcode       | Biolegend                 | 2M2         | 316302     |
| 110Pd   | $\beta$ 2m-Barcode       | Biolegend                 | 2M2         | 316302     |
| 111 Cd  | CD4                      | Biolegend                 | RPA-T4      | 300502     |
| 112 Cd  | CD3                      | Biolegend                 | UCHT1       | 300402     |
| 113 Cd  | CD39                     | Biolegend                 | A1          | 328202     |
| 114 Cd  | IRF4                     | Invitrogen                | 3E4         | 14-9858-82 |
| 115 In  | CD57                     | Invitrogen                | TB01        | 16-0577-85 |
| 116 Cd  | CD8                      | Biolegend                 | RPA-T8      | 301002     |
| 139 La  | MM-DOTA                  |                           |             |            |
| 140 etc | Beads                    |                           |             |            |
| 141 Pr  | CD19                     | Biolegend                 | HIB19       | 302202     |
| 142 Nd  | IFN- $\gamma$            | Biolegend                 | B27         | 506502     |
| 143 Nd  | HIF1 $\alpha$            | Abcam                     | EP1215Y     | ab210073   |
| 144 Nd  | CTLA-4                   | BD                        | BNI3        | 555850     |
| 145 Nd  | TNF- $\alpha$            | Invitrogen                | MAb11       | 14-7349-85 |
| 146 Nd  | Ki-67                    | BD                        | B56         | 556003     |
| 147 Sm  | CD45RA                   | Biolegend                 | HI100       | 304143     |
| 148 Nd  | ACC                      | Cell Signaling Technology | C83B10      | 3676BF     |
| 149 Sm  | GLS1                     | Cell Signaling Technology | E4T9Q       | 49363BF    |
| 150 Nd  | CD127                    | Biolegend                 | A019D5      | 351302     |
| 151 Eu  | Flag-Tag (anti-DYKDDDDK) | BioLegend                 | L5          | 637301     |
| 152 Sm  | IL-2                     | Invitrogen                | MQ1-17H12   | 14-7029-85 |
| 153 Eu  | CPT1 $\alpha$            | Cell Signaling Technology | D3B3        | 12252BF    |
| 154 Sm  | XCL-1                    | R&D                       | 109001      | MAB6951    |
| 155 Gd  | CD27                     | Biolegend                 | O323        | 302802     |
| 156 Gd  | TOMM20                   | Abcam                     | ERP15581-54 | ab232589   |
| 157 Gd  | FOXO1                    | Biolegend                 | 2F8B08      | 658102     |
| 158 Gd  | PD-1                     | Biolegend                 | EH12.2H7    | 329902     |
| 159 Tb  | CCR7                     | Biolegend                 | G043H7      | 353255     |
| 160 Gd  | Tbet                     | Biolegend                 | 4B10        | 644802     |
| 161 Dy  | CD28                     | Biolegend                 | CD28.2      | 302902     |
| 162 Dy  | Tim-3                    | BioLegend                 | F38-2E2     | 345002     |
| 163 Dy  | TCF-1                    | Biolegend                 | 7F11A10     | 615702     |

|         |                    |            |          |             |
|---------|--------------------|------------|----------|-------------|
| 164 Dy  | CytC               | Biologend  | 6H2.B4   | 612302      |
| 165 Ho  | Eomes              | Invitrogen | WD1928   | 14-4877-82  |
| 166 Er  | Bodipy             | Invitrogen | poly     | A5770       |
| 167 Er  | CD38               | Biologend  | HIT2     | 303502      |
| 168 Er  | TOX                | Milteny    | REA473   | 130-095-212 |
| 169 Tm  | TIGIT              | Invitrogen | MBSA43   | 16-9500-82  |
| 170 Er  | LAG-3              | Biologend  | 11C3C65  | 369302      |
| 171 Yb  | 2B4                | Biologend  | C1.7     | 329502      |
| 172 Yb  | CD71               | Invitrogen | OKT9     | 14-0719-82  |
| 173 Yb  | CCL3/4             | R&D        | 93342    | MAB2701     |
| 174 Yb  | IL-10              | Biologend  | JES3-9D7 | 501402      |
| 175 Lu  | GLUT1              | Abcam      | EPR3915  | ab252403    |
| 176 Yb  | CD36               | Biologend  | 5-271    | 336202      |
| 191/193 | Iridium            |            |          |             |
| 194Pt   | Perforin           | abcam      | B-D48    | ab47225     |
| 198 Pt  | $\beta$ 2m-Barcode |            |          |             |
| 209 Bi  | CD16               | fluidigm   | 3G8      | 3165001C    |

**Supplementary Table 2: Antibodies used for Flow Cytometry**

| <b>Conjugate</b> | <b>Antigen</b>           | <b>Supplier</b>                 | <b>Clone</b> | <b>Cat#</b> |
|------------------|--------------------------|---------------------------------|--------------|-------------|
|                  | Strep-Tag<br>(NWSHPQFEK) | Genscript                       | 5A9F9        | A01736      |
| APC              | Flag-Tag<br>(DYKDDDDK)   | BioLegend                       | L5           | 637308      |
| Biotin           | mouse IgG                | Invitrogen                      |              | 31803       |
| Biotin           | human PD-1               | BioLegend                       | EH12.2H7     | 329934      |
| PECy7            | human Tim-3              | BioLegend                       | F382E2       | 345014      |
| Alexa 647        | human LAG-3              | BioLegend                       | 11C3C65      | 369304      |
| PE               | human CD25               | BioLegend                       | BC96         | 302606      |
| PECy7            | human CD137              | Invitrogen                      | 4B4-1        | 25-1379-42  |
| APC              | human CD69               | Invitrogen                      | CH/4         | MHCD6905    |
| PE               | human CD8                | Beckman<br>Coulter              | B9.11        | IM0452U     |
| APC              | human CD8                | Beckman<br>Coulter              | B9.11        | IM2469      |
| PECy7            | human CD4                | eBioscience                     | RPA-T4       | 25-0049-42  |
| PE               | human CD107a             | Biolegend                       | H4A3         | 328608      |
| PECy7            | human CD4                | eBioscience                     | 14D3         | 25-1529-42  |
| PECy7            | human<br>TCF1/TCF7       | Cell<br>Signaling<br>Technology | C63D9        | 90511       |
| PECy7            | human CD45RA             | Biolegend                       | HI100        | 304126      |
| APC              | human CD27               | BD<br>Pharmingen                | MT271        | 561400      |
| BV421            | human CD3                | BioLegend                       | UCHT1        | 300434      |
| Alexa 488        | human CD3                | BioLegend                       | UCHT1        | 300415      |
| APC              | Streptavidin             | BioLegend                       |              | 405207      |
| PECy7            | Streptavidin             | Invitrogen                      |              | SA1012      |
| eFluor<br>450    | Streptavidin             | Invitrogen                      |              | 48-4317-82  |
