# Supplementary material for: Harnessing CD3 diversity to optimize CAR T cells
Source: PubMed Central journal article supplement (PMC10681901; doi:10.1038/s41590-023-01658-z), 2023-11-06
Supplement: 41590_2023_1658_MOESM12_ESM.pdf [file 41590_2023_1658_MOESM12_ESM.pdf]

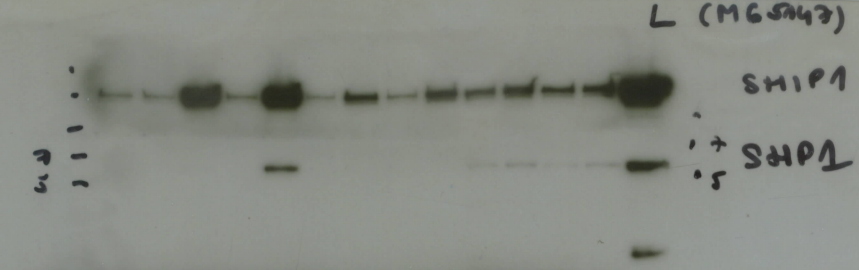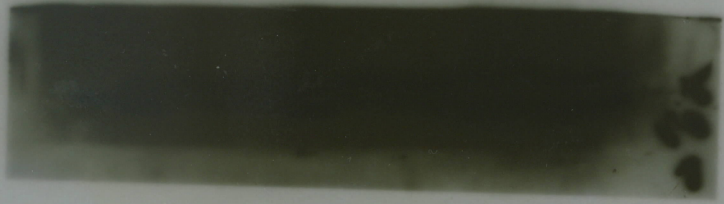

Avid-HRP

10% gel

18.3.17
